# Supplementary material for: Urban Bird Community Assembly Mechanisms and Driving Factors in University Campuses in Nanjing, China
Source: MDPI journal article supplement (doi:10.3390/ani13040673), 2023-02-15
Supplement: s1 [file s1]

## Supplementary Materials

Table S1. The best prediction models of functional diversity (FDMPD, FDMNTD) and phylogenetic diversity (PDMPD, PDMNTD) showing in the order of increasing AICc (Akaike Information Criterion for small sample size),  $\Delta$ AICc and weight (Akaike weights) based on the multiple linear regression models. df = degrees of freedom, logLik = log likelihood. adj.  $R^2$  = adjusted  $R^2$ . For abbreviations see Table 1.

| Time   | Response variable | Models               | df | logLik | AICc  | $\Delta$ AICc | weight | adj. $R^2$ |
|--------|-------------------|----------------------|----|--------|-------|---------------|--------|------------|
| year   | FD                | water                | 4  | -6.66  | 27.03 | 0             | 0.38   | 0.00       |
|        | FDMPD             | building+water       | 5  | -7.12  | 34.23 | 0             | 0.71   | 0.24       |
|        | FDMNTD            | water                | 4  | -4.32  | 22.36 | 0             | 0.31   | 0.02       |
|        | PD                | grass+water          | 5  | -8.93  | 37.87 | 0             | 0.8    | 0.36       |
|        | PDMPD             | water                | 4  | -6.27  | 26.26 | 0             | 0.31   | -0.22      |
|        | PDMNTD            | water                | 4  | -5.07  | 23.85 | 0             | 0.25   | -0.04      |
| spring | FD                | grass+water          | 5  | -1.29  | 22.59 | 0             | 0.94   | 0.93       |
|        | FDMPD             | water                | 4  | -7.77  | 29.25 | 0             | 0.7    | 0.02       |
|        | FDMNTD            | building+water       | 5  | -6.5   | 33.01 | 0             | 0.52   | 0.61       |
|        | PD                | water                | 4  | -7.44  | 28.6  | 0             | 0.37   | 0.33       |
|        | PDMPD             | water                | 4  | -10.59 | 34.89 | 0             | 0.37   | -0.09      |
|        | PDMNTD            | water                | 4  | -9.05  | 31.82 | 0             | 0.43   | 0.00       |
| summer | FD                | building+water       | 5  | -7.37  | 34.74 | 0             | 0.43   | 0.36       |
|        | FDMPD             | water                | 4  | -9.42  | 32.55 | 0             | 0.39   | 0.25       |
|        | FDMNTD            | water                | 4  | -6.86  | 27.44 | 0             | 0.63   | 0.69       |
|        | PD                | building+grass+water | 6  | 1.66   | 25.47 | 0             | 0.55   | 0.92       |
|        | PDMPD             | grass+water          | 5  | -5.46  | 30.92 | 0             | 0.29   | 0.16       |
|        | PDMNTD            | grass+water          | 5  | -5.51  | 31.01 | 0             | 0.29   | 0.06       |
| autumn | FD                | water                | 4  | -12.12 | 37.95 | 0             | 0.43   | 0.42       |
|        | FDMPD             | building+water       | 5  | -11.25 | 42.5  | 0             | 0.41   | 0.18       |
|        | FDMNTD            | water                | 4  | -11.82 | 37.35 | 0             | 0.41   | 0.46       |
|        | PD                | grass+water          | 5  | -7.51  | 35.01 | 0             | 0.52   | 0.56       |
|        | PDMPD             | water                | 4  | -15.57 | 44.85 | 0             | 0.34   | 0.14       |
|        | PDMNTD            | water                | 4  | -15.43 | 44.57 | 0             | 0.37   | 0.02       |
| winter | FD                | grass+water          | 5  | -6.02  | 32.04 | 0             | 0.38   | 0.43       |
|        | FDMPD             | water                | 4  | -13.77 | 41.25 | 0             | 0.32   | 0.07       |
|        | FDMNTD            | grass+water          | 5  | -9.23  | 38.46 | 0             | 0.36   | 0.49       |
|        | PD                | building+water       | 5  | -6.62  | 33.25 | 0             | 0.48   | 0.37       |
|        | PDMPD             | building+water       | 5  | -9.62  | 39.24 | 0             | 0.52   | 0.18       |
|        | PDMNTD            | building+water       | 5  | -4.07  | 28.15 | 0             | 0.43   | 0.05       |

Table S2. List of birds in 12 campuses of Nanjing, three animals protection that means beneficial, has important economic value and scientific research value, II is the second-class protected animal.

| Order            | Family        | Species                 | Resident       | geographic area    | protection class         |
|------------------|---------------|-------------------------|----------------|--------------------|--------------------------|
| Podicipediformes | Podicipedidae | Tachybaptus ruficollis  | Resident       | Widespread species | Three animals protection |
| Ciconiiformes    | Ardeidae      | Egretta garzetta        | Summer migrant | Oriental Realm     | Three animals protection |
|                  |               | Ardeola bacchus         | Summer migrant | Oriental Realm     | Three animals protection |
|                  |               | Nycticorax nycticorax   | Resident       | Widespread species | Three animals protection |
|                  |               | Bubulcus ibis           | Summer migrant | Oriental Realm     | Three animals protection |
|                  |               | Butorides striata       | Summer migrant | Oriental Realm     | Three animals protection |
| Gruiformes       | Rallidae      | Gallinula chloropus     | Resident       | Widespread species | Three animals protection |
| Columbiformes    | Columbidae    | Streptopelia orientalis | Resident       | Widespread species | Three animals protection |
|                  |               | Spilopelia chinensis    | Resident       | Oriental Realm     | Three animals protection |
|                  |               | Columba livia           | Resident       | Widespread species | Three animals protection |
| Passeriformes    | Pycnonotidae  | Pycnonotus sinensis     | Resident       | Widespread species | Three animals protection |
|                  |               | Spizixos semitorques    | Resident       | Oriental Realm     | Three animals protection |
|                  |               | Pycnonotus jocosus      | Winter migrant | Oriental Realm     | Three animals protection |
|                  | Motacillidae  | Motacilla alba          | Resident       | Palearctic realm   | Three animals protection |
|                  |               | Motacilla cinerea       | Passenger      | Palearctic realm   | Three animals protection |
|                  |               | Anthus hodgsoni         | Winter migrant | Palearctic realm   | Three animals protection |
|                  | Laniidae      | Lanius schach           | Resident       | Oriental Realm     | Three animals protection |
|                  |               | Lanius cristatus        | Summer migrant | Palearctic realm   | Three animals protection |
|                  | Corvidae      | Cyanopica cyanus        | Resident       | Palearctic realm   | Three animals protection |
|                  |               | Pica pica               | Resident       | Widespread species | Three animals protection |
|                  |               | Urocissa erythrorhyncha | Resident       | Oriental Realm     | Three animals protection |
|                  | Turdidae      | Dendrocitta formosae    | Resident       | Oriental Realm     | Three animals protection |
|                  |               | Turdus merula           | Resident       | Oriental Realm     | Three animals protection |

|                   |                                  |                |                    |                          |
|-------------------|----------------------------------|----------------|--------------------|--------------------------|
|                   | <i>Turdus hortulorum</i>         | Winter migrant | Palearctic realm   | Three animals protection |
| Timaliidae        | <i>Garrulax perspicillatus</i>   | Resident       | Oriental Realm     | Three animals protection |
| Ploceidae         | <i>Passer montanus</i>           | Resident       | Widespread species | Three animals protection |
|                   | <i>Lonchura striata</i>          | Resident       | Oriental Realm     | Three animals protection |
| Passeridae        | <i>Eophona migratoria</i>        | Resident       | Palearctic realm   | Three animals protection |
|                   | <i>Carduelis sinica</i>          | Resident       | Widespread species | Three animals protection |
|                   | <i>Fringilla montifringilla</i>  | Winter migrant | Palearctic realm   | Three animals protection |
| Dicruridae        | <i>Dicrurus macrocercus</i>      | Resident       | Widespread species | Three animals protection |
| Paradoxornithidae | <i>Paradoxornis webbianus</i>    | Resident       | Oriental Realm     | Three animals protection |
| Paridae           | <i>Parus minor</i>               | Resident       | Widespread species | Three animals protection |
|                   | <i>Aegithalos caudatus</i>       | Resident       | Palearctic realm   | Three animals protection |
|                   | <i>Aegithalos concinnus</i>      | Resident       | Oriental Realm     | Three animals protection |
|                   | <i>Parus venustulus</i>          | Winter migrant | Oriental Realm     | Three animals protection |
| Sturnidae         | <i>Acridotheres cristatellus</i> | Resident       | Oriental Realm     | Three animals protection |
|                   | <i>Sturnus sericeus</i>          | Resident       | Oriental Realm     | Three animals protection |
|                   | <i>Sturnus cineraceus</i>        | Resident       | Palearctic realm   | Three animals protection |
|                   | <i>Sturnus nigricollis</i>       | Winter migrant | Oriental Realm     | Three animals protection |
| Muscicapidae      | <i>Copsychus saularis</i>        | Resident       | Oriental Realm     | Three animals protection |
|                   | <i>Phoenicurus aureus</i>        | Winter migrant | Palearctic realm   | Three animals protection |
|                   | <i>Tarsiger cyanurus</i>         | Winter migrant | Palearctic realm   | Three animals protection |
| Sylviidae         | <i>Phylloscopus proregulus</i>   | Winter migrant | Palearctic realm   | Three animals protection |
|                   | <i>Phylloscopus inornatus</i>    | Winter migrant | Palearctic realm   | Three animals protection |
|                   | <i>Horornis fortipes</i>         | Resident       | Oriental Realm     | Three animals protection |
| Hirundinidae      | <i>Cecropis daurica</i>          | Summer migrant | Widespread species | Three animals protection |
|                   | <i>Hirundo rustica</i>           | Summer migrant | Widespread species | Three animals protection |
| Campephagidae     | <i>Pericrocotus cantonensis</i>  | Passenger      | Widespread species | Three animals protection |

|                 |              |                            |                |                    |                          |
|-----------------|--------------|----------------------------|----------------|--------------------|--------------------------|
|                 | Zosteropidae | Zosterops japonicus        | Summer migrant | Oriental Realm     | Three animals protection |
| Piciformes      | Picidae      | Dendrocopos canicapillus   | Resident       | Oriental Realm     | Three animals protection |
|                 |              | Picumnus innominatus       | Resident       | Oriental Realm     | Three animals protection |
|                 |              | Dendrocopos major          | Resident       | Oriental Realm     | Three animals protection |
|                 |              | Picus canus                | Resident       | Oriental Realm     | Three animals protection |
| Falconiformes   | Accipitridae | Milvus migrans lineatus    | Resident       | Widespread species | II                       |
| Coraciiformes   | Alcedinidae  | Alcedo atthis              | Resident       | Widespread species | Three animals protection |
|                 |              | Ceryle rudis               | Resident       | Widespread species | Three animals protection |
|                 | Coraciidae   | Eurystomus orientalis      | Passenger      | Oriental Realm     | Three animals protection |
| Charadriiformes | Charadriidae | Vanellus cinereus          | Winter migrant | Oriental Realm     | Three animals protection |
|                 | Scolopacidae | Tringa ochropus            | Winter migrant | Paleartic realm    | Three animals protection |
| Cuculiformes    | Cuculidae    | Eudynamys scolopaceus      | Resident       | Oriental Realm     | Three animals protection |
|                 |              | Hierococcyx sparveriioides | Summer migrant | Oriental Realm     | Three animals protection |
|                 |              | Cuculus micropterus        | Summer migrant | Oriental Realm     | Three animals protection |
| Anseriformes    | Anatidae     | Anas poecilorhyncha        | Winter migrant | Paleartic realm    | Three animals protection |
| Galliformes     | Phasianidae  | Bambusicola thoracica      | Resident       | Widespread species | Three animals protection |
|                 |              | Phasianus colchicus        | Resident       | Widespread species | Three animals protection |
| Bucerotiformes  | Upupidae     | Upupa epops                | Resident       | Widespread species | Three animals protection |

---

Table S3. Campus bird survey transects

| Campus | Length of the first transect<br>(km) | Length of the second transect<br>(km) | Total length of transects (km) |
|--------|--------------------------------------|---------------------------------------|--------------------------------|
| NFU1   | 0.80                                 | 1.43                                  | 2.23                           |
| NU1    | 0.54                                 | 0.54                                  | 1.08                           |
| NNU1   | 0.51                                 | 0.52                                  | 1.03                           |
| NAAU1  | 0.98                                 | 0.89                                  | 1.87                           |
| NAU1   | 0.93                                 | 0.91                                  | 1.84                           |
| SEU1   | 0.80                                 | 0.88                                  | 1.68                           |
| NU2    | 1.68                                 | 1.75                                  | 3.43                           |
| NNU2   | 0.94                                 | 0.82                                  | 1.76                           |
| NCIT2  | 0.77                                 | 0.64                                  | 1.41                           |
| NFEU2  | 1.07                                 | 1.22                                  | 2.29                           |
| NCMU2  | 1.16                                 | 1.21                                  | 2.37                           |
| NPTU2  | 1.03                                 | 0.94                                  | 1.97                           |

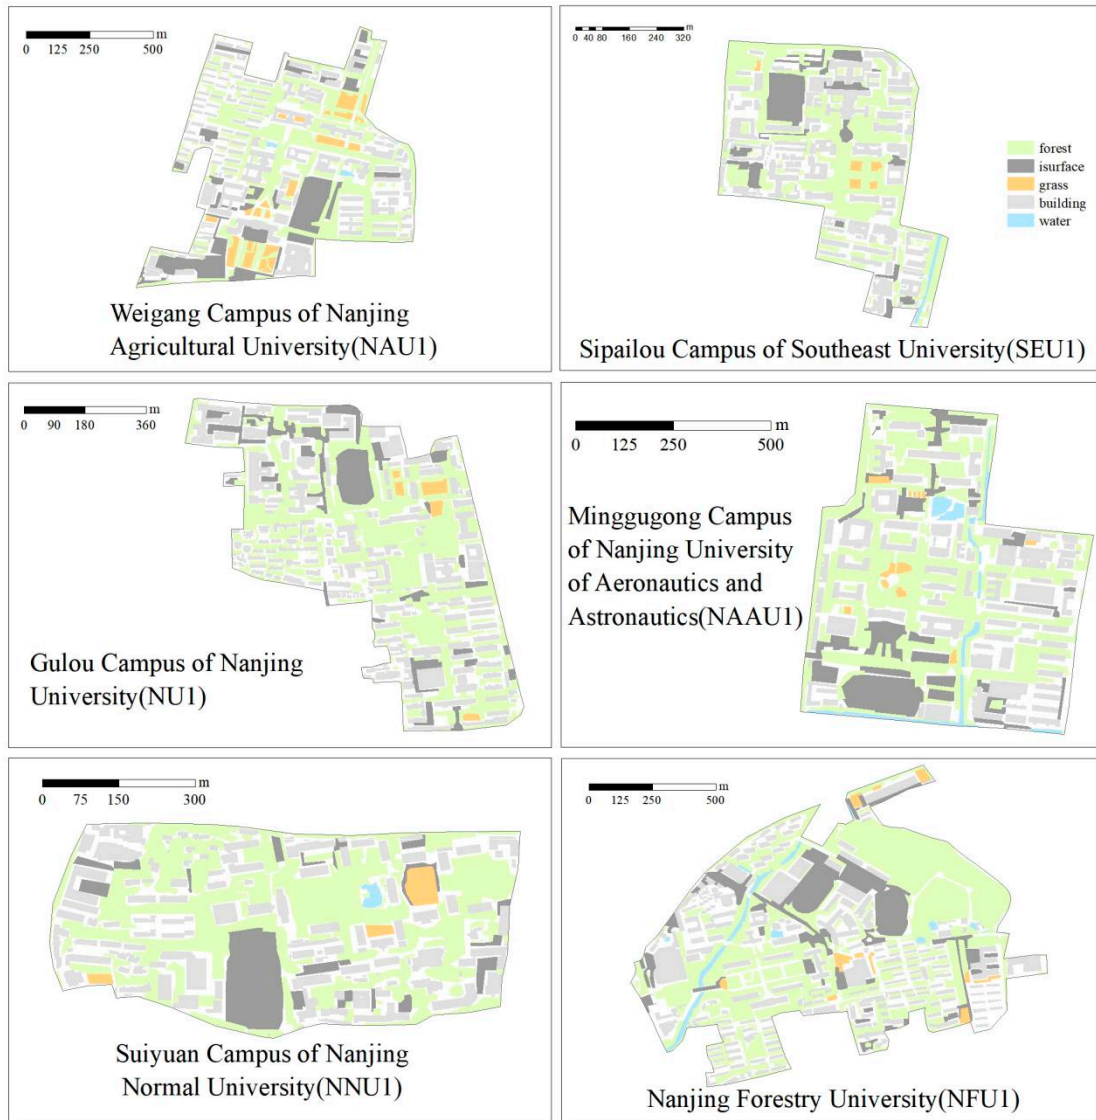

Figure S1. Classification of land use types of six universities in the downtown area.

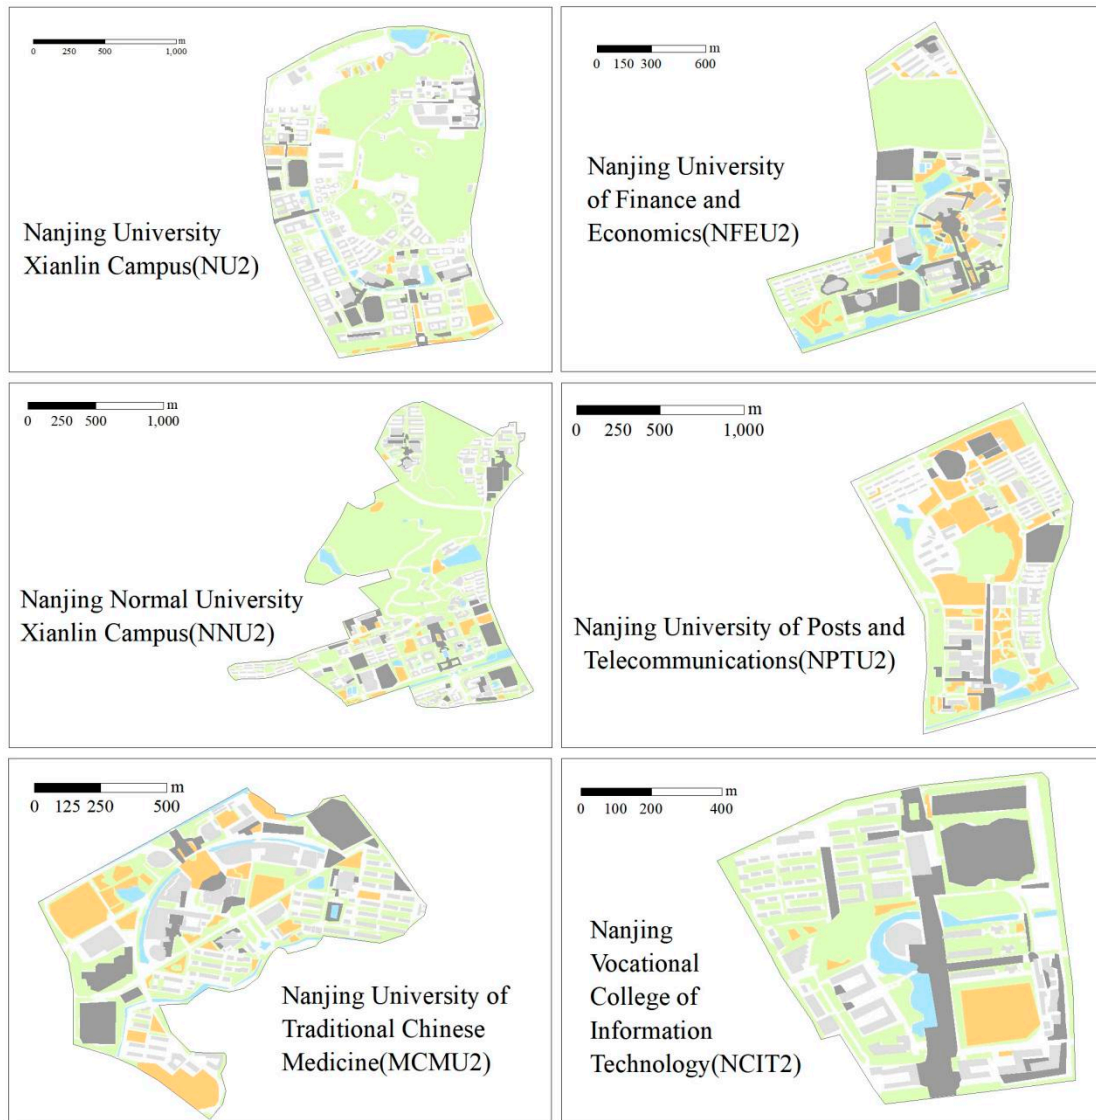

Figure S2. Classification of land use types of six universities in the newly developed area.
